# Supplementary material for: Two-dimensional ultra-thin nanosheets optimize the surface reaction dynamics and photo/pyro-generated carrier transfer of NaNbO3 for an efficient pyro-photo-electric catalytic system
Source: Royal Society of Chemistry journal article supplement (doi:10.1039/d2se00804a), 2022-01-01
Supplement: d2se00804a1.pdf [file d2se00804a1.pdf]

## Supporting information

To calculate the absorbed photocurrent density of the photoelectrode:  $J_{abs}$  is defined as the photocurrent density generated when the photoelectrode converts 100% of the absorbed photon energy into electrons and holes, representing the theoretical relationship that the absorbed photons completely convert the photocurrent.  $P_{abs}(\lambda)$  ( $mW/(cm^2 \cdot nm)$ ) is integrated with the wavelength  $\lambda$  to obtain the total power ( $mW/cm^2$ ), that is, the power actually absorbed by the photoelectrode, which is then converted into the photocurrent  $J_{abs}$  according to equation (11):

$$J_{abs} \left( \frac{mA}{cm^2} \right) = \int_{\lambda_1}^{\lambda_2} \frac{\lambda(nm)}{1240(V \cdot nm)} \times \frac{P_{abs}(\lambda)}{10} \left( \frac{mW}{cm^2 \cdot nm} \right) d\lambda \quad (11)$$

In addition, Fig. S7 can be obtained from the UV/Vis absorption spectrum, which is the cut-off wavelength diagram of the photoelectrode light absorption under AM 1.5 G simulated sunlight illumination, and the arrow indicates the intrinsic absorption of the photoelectrode.

In the previous experiment, we controlled the grain size by hydrothermal time and temperature. The  $NaNbO_3$  prepared by hydrothermal method was orthorhombic phase. As shown in the Fig. S11a-c, it can be clearly observed that when the hydrothermal time is 4 h, 6 h and 10 h, the grain size is  $\sim 0.5 \mu m$ ,  $\sim 1 \mu m$  and  $\sim 2 \mu m$  respectively. The grain size increases with the increase of hydrothermal time. According to the hydrothermal temperature gradient experiment (Fig. S11d-c), with the increase of hydrothermal temperature, the grains gradually grow and become more complete, showing a cube-shaped structure.

Using samples with different grain sizes synthesized in previous experiments, we compared the effects of different grain sizes on pyro-photo-electric catalytic properties. As shown in the Fig. S12, under the stimulation of light and thermal cycle, when the grain size of the sample is  $\sim 1 \mu m$ , the current density reaches  $0.38 mA/cm^2$  at  $1.23 V_{RHE}$ , higher than  $\sim 0.5 \mu m$  and  $\sim 2 \mu m$  samples. This indicates that when the grain size of the sample is  $\sim 1 \mu m$  has better pyro-photo-electric catalytic properties. We speculate that the reason may be the difference of spontaneous polarization intensity<sup>[60]</sup>.

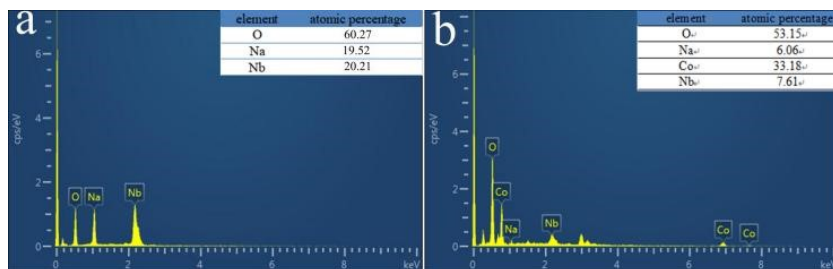

Fig. S1 EDS elemental analysis spectrum. (a)  $\text{NaNbO}_3$  photoanode; (b)  $\text{NaNbO}_3/\text{Co}(\text{OH})_2$  composite electrode

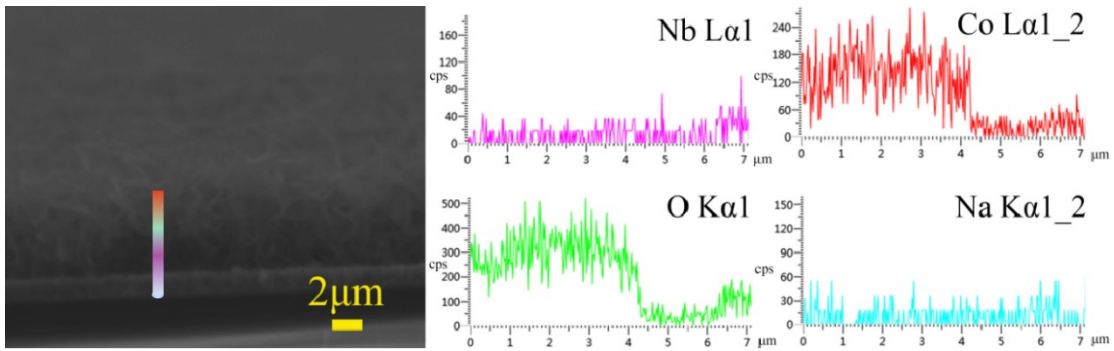

Fig.S2 Cross-sectional SEM image of  $\text{NaNbO}_3/\text{Co}(\text{OH})_2$  composite electrode, showing the EDS line scan at which the atom distribution

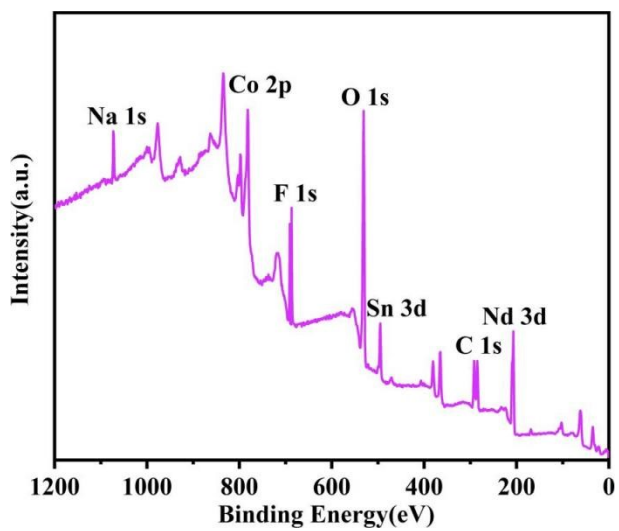

Fig.S3 XPS spectra of survey

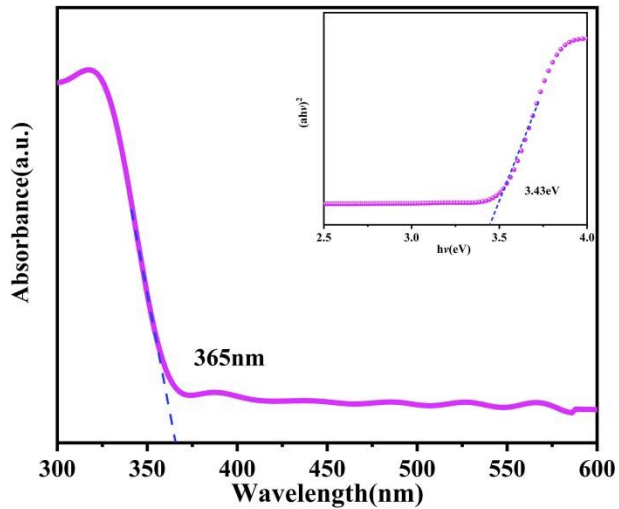

Fig.S4 UV-visible absorption spectrum of NaNbO<sub>3</sub>, the inset is  $(\alpha h\nu)^2$  versus photon energy ( $h\nu$ ) curve

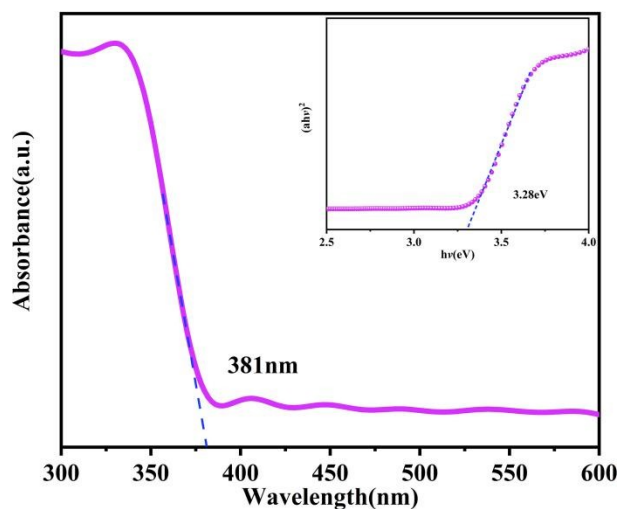

Fig.S5 UV-visible absorption spectrum of  $\text{NaNbO}_3/\text{Co(OH)}_2$ , the inset is  $(\alpha hv)^2$  versus photon energy ( $h\nu$ ) curve

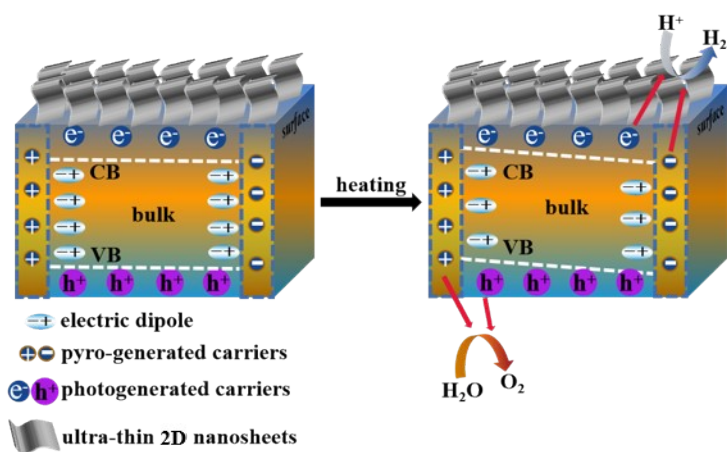

Fig. S6 The mechanism of pyro-photo-electric catalysis process

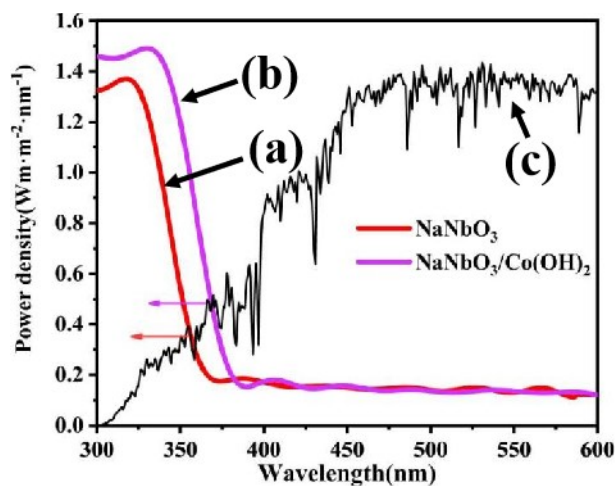

Fig.S7 The light absorption cut-off wavelength diagram of NaNbO<sub>3</sub> electrode and NaNbO<sub>3</sub>/Co(OH)<sub>2</sub> composite electrode under AM 1.5G simulated sunlight illumination (100 mW/cm<sup>2</sup>); (a) NaNbO<sub>3</sub> electrode; (b) NaNbO<sub>3</sub>/Co(OH)<sub>2</sub> composite electrode; (c) AM 1.5G simulated sunlight illumination power density

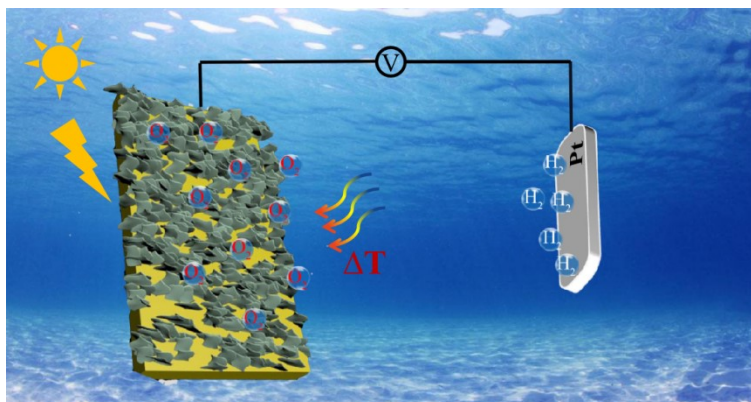

Fig. S8 Schematic diagram of synergistic water splitting by pyroelectric and photoelectrochemical catalysis

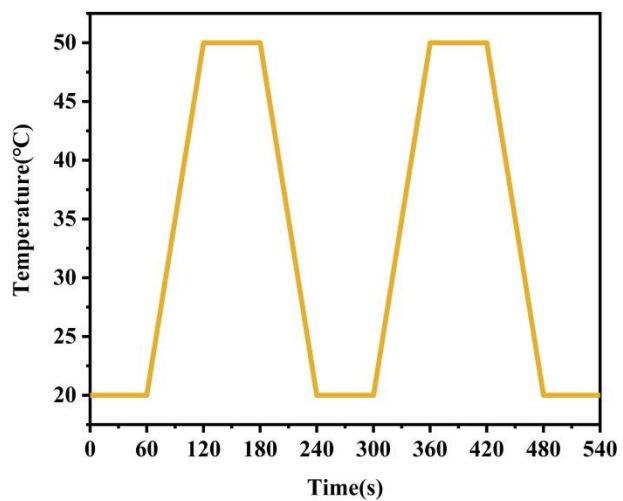

Fig. S9 The ideal temperature curve for cold-hot thermal cycles

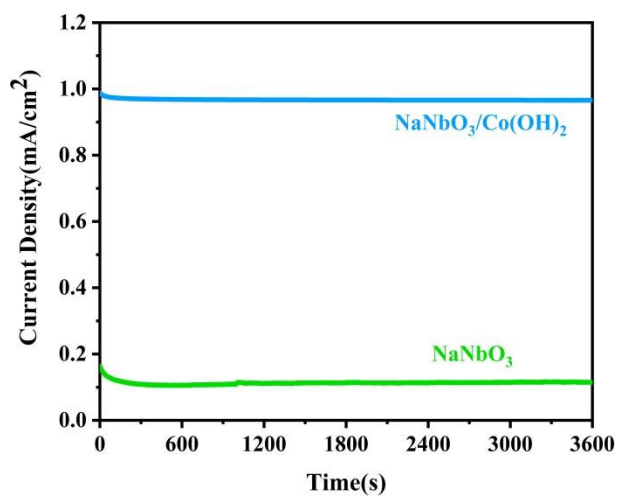

Fig. S10 Steady-state current curves of NaNbO<sub>3</sub> electrode and NaNbO<sub>3</sub>/Co(OH)<sub>2</sub> composite electrode measured in 1.0 M Na<sub>2</sub>SO<sub>4</sub> (pH=6.8) electrolyte under consistent one sun illumination for 3600 s

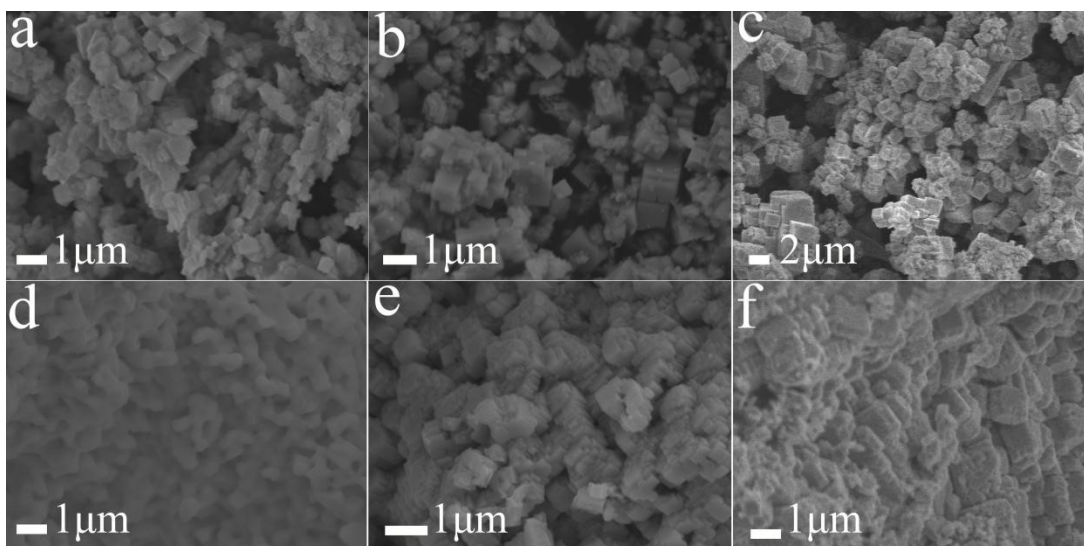

Fig. S11 The  $\text{NaNbO}_3$  synthesized at different hydrothermal time and temperature; (a) 160 °C-4 h; (b) 160 °C-6 h; (c) 160 °C-10 h; (d) 120 °C-8 h; (e) 140 °C-8 h; (f) 180 °C-8 h

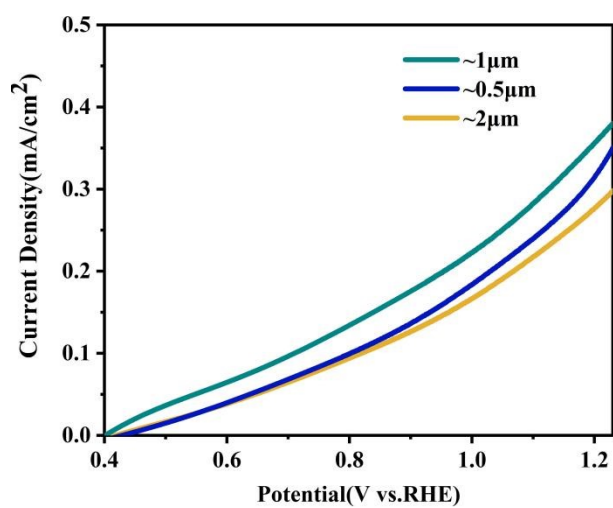

Fig. S12 The I-V curves of  $\text{NaNbO}_3$  samples with different grain sizes (Under the light +  $\Delta T$ )

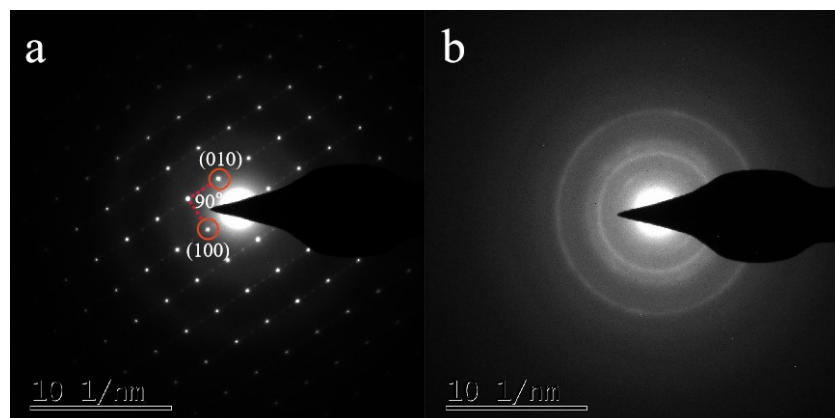

Fig. S13 The SEAD of  $\text{NaNbO}_3$  and  $\text{Co(OH)}_2$ ; (a)  $\text{NaNbO}_3$ ; (b)  $\text{Co(OH)}_2$

Tab. S1 Flat band potential ( $V_{fb}$ ) and donor density ( $N_d$ ) of electrodes deduced from Mott-Schottky

| Sample                                   | $\text{NaNbO}_3$ |            |                       | $\text{NaNbO}_3/\text{Co(OH)}_2$ |            |                       |
|------------------------------------------|------------------|------------|-----------------------|----------------------------------|------------|-----------------------|
|                                          | light            | $\Delta T$ | light +<br>$\Delta T$ | light                            | $\Delta T$ | light +<br>$\Delta T$ |
| $V_{fb}$ (V)<br>Vs. RHE                  | -0.01            | 0.1        | -0.26                 | -0.21                            | -0.06      | -0.36                 |
| $N_d$ ( $\cdot 10^{17} \text{cm}^{-3}$ ) | 7.7              | 6.9        | 10                    | 14.1                             | 10.2       | 20.6                  |



Tab. S2 the comparison of pyro-photo-electric catalytic properties of other composites

| Materials                                                              | pyro-photo-electric catalytic properties | Publishing year |
|------------------------------------------------------------------------|------------------------------------------|-----------------|
| BaTiO <sub>3-x</sub> -5% <sup>[61]</sup>                               | 0.77 mA/cm <sup>2</sup>                  | 2022            |
| Ba <sub>0.7</sub> Sr <sub>0.3</sub> TiO <sub>3-x</sub> <sup>[62]</sup> | 0.92 mA/cm <sup>2</sup>                  | 2022            |
| K <sub>x</sub> Na <sub>1-x</sub> NbO <sub>3</sub> <sup>[63]</sup>      | 0.528 mA/cm <sup>2</sup>                 | 2022            |
| NaNbO <sub>3</sub> /Co(OH) <sub>2</sub>                                | 1.68 mA/cm <sup>2</sup>                  |                 |
